# Supplementary material
Source: Research Square preprint supplement (doi:10.21203/rs.3.rs-8920791/v1)

**Supplementary material**

1- Acknowledgments

The authors would like to thank all participants who responded to the survey and the dentists who distributed the survey to their patients.

2-Funding

This research received no specific grant from any funding agency in the public, commercial, or not-for-profit sectors.

3-Author information

- College of Dentistry, Imam Abdulrahman Bin Faisal University, Dammam, Saudi Arabia, Yaser Nizar Alqabbani
- Department of Biomedical Dental Sciences, College of Dentistry, Imam Abdulrahman Bin Faisal University, Dammam 31441, Saudi Arabia, Dr. Sami Mohammed Alshehry

4- Contributions

Y.A. (Yaser Alqabbani) conceptualized the study, collected and analyzed the data, and drafted the manuscript.

S.M.A. (Sami Mohammed Alshehry) supervised the research process, provided guidance on study design and statistical interpretation, and critically revised the manuscript for important intellectual content.

Both authors reviewed and approved the final version of the manuscript.

5- Corresponding author

Correspondence to S.M.A. (Sami Mohammed Alshehry)

6-Ethical approval

This study was approved by the Deanship of Scientific Research- Imam Abdulrahman bin Faisal University (IRB-2025-02-0276).

7-Consent to participate

Participation in the study was voluntary, and no incentives were offered to participate in the study to participants or to the dentists who distributed the survey to their patients. Participants were presented with an informed consent form with a preview of the study objectives. Data collection was performed in accordance with relevant guidelines and regulations of Deanship of Imam Abdulrahman bin Faisal university.

### 8-Consent for publication

Not applicable. Survey completion implied consent for the use and publication of anonymized data in accordance of Deanship of Imam Abdulrahman bin Faisal university.

### 9- Competing interests

The authors declare no competing interests.

10- Data availability

The data can be provided by the corresponding author upon reasonable request.

Declaration of Helsinki

This study adhered to the ethical principles of the **Declaration of Helsinki**. Ethical approval was obtained from the Deanship of Scientific Research-Imam Abdulrahman bin Faisal University Institutional Review Board (IRB) (approval number: IRB-2025-02-0276).All participants provided written informed consent before participation.


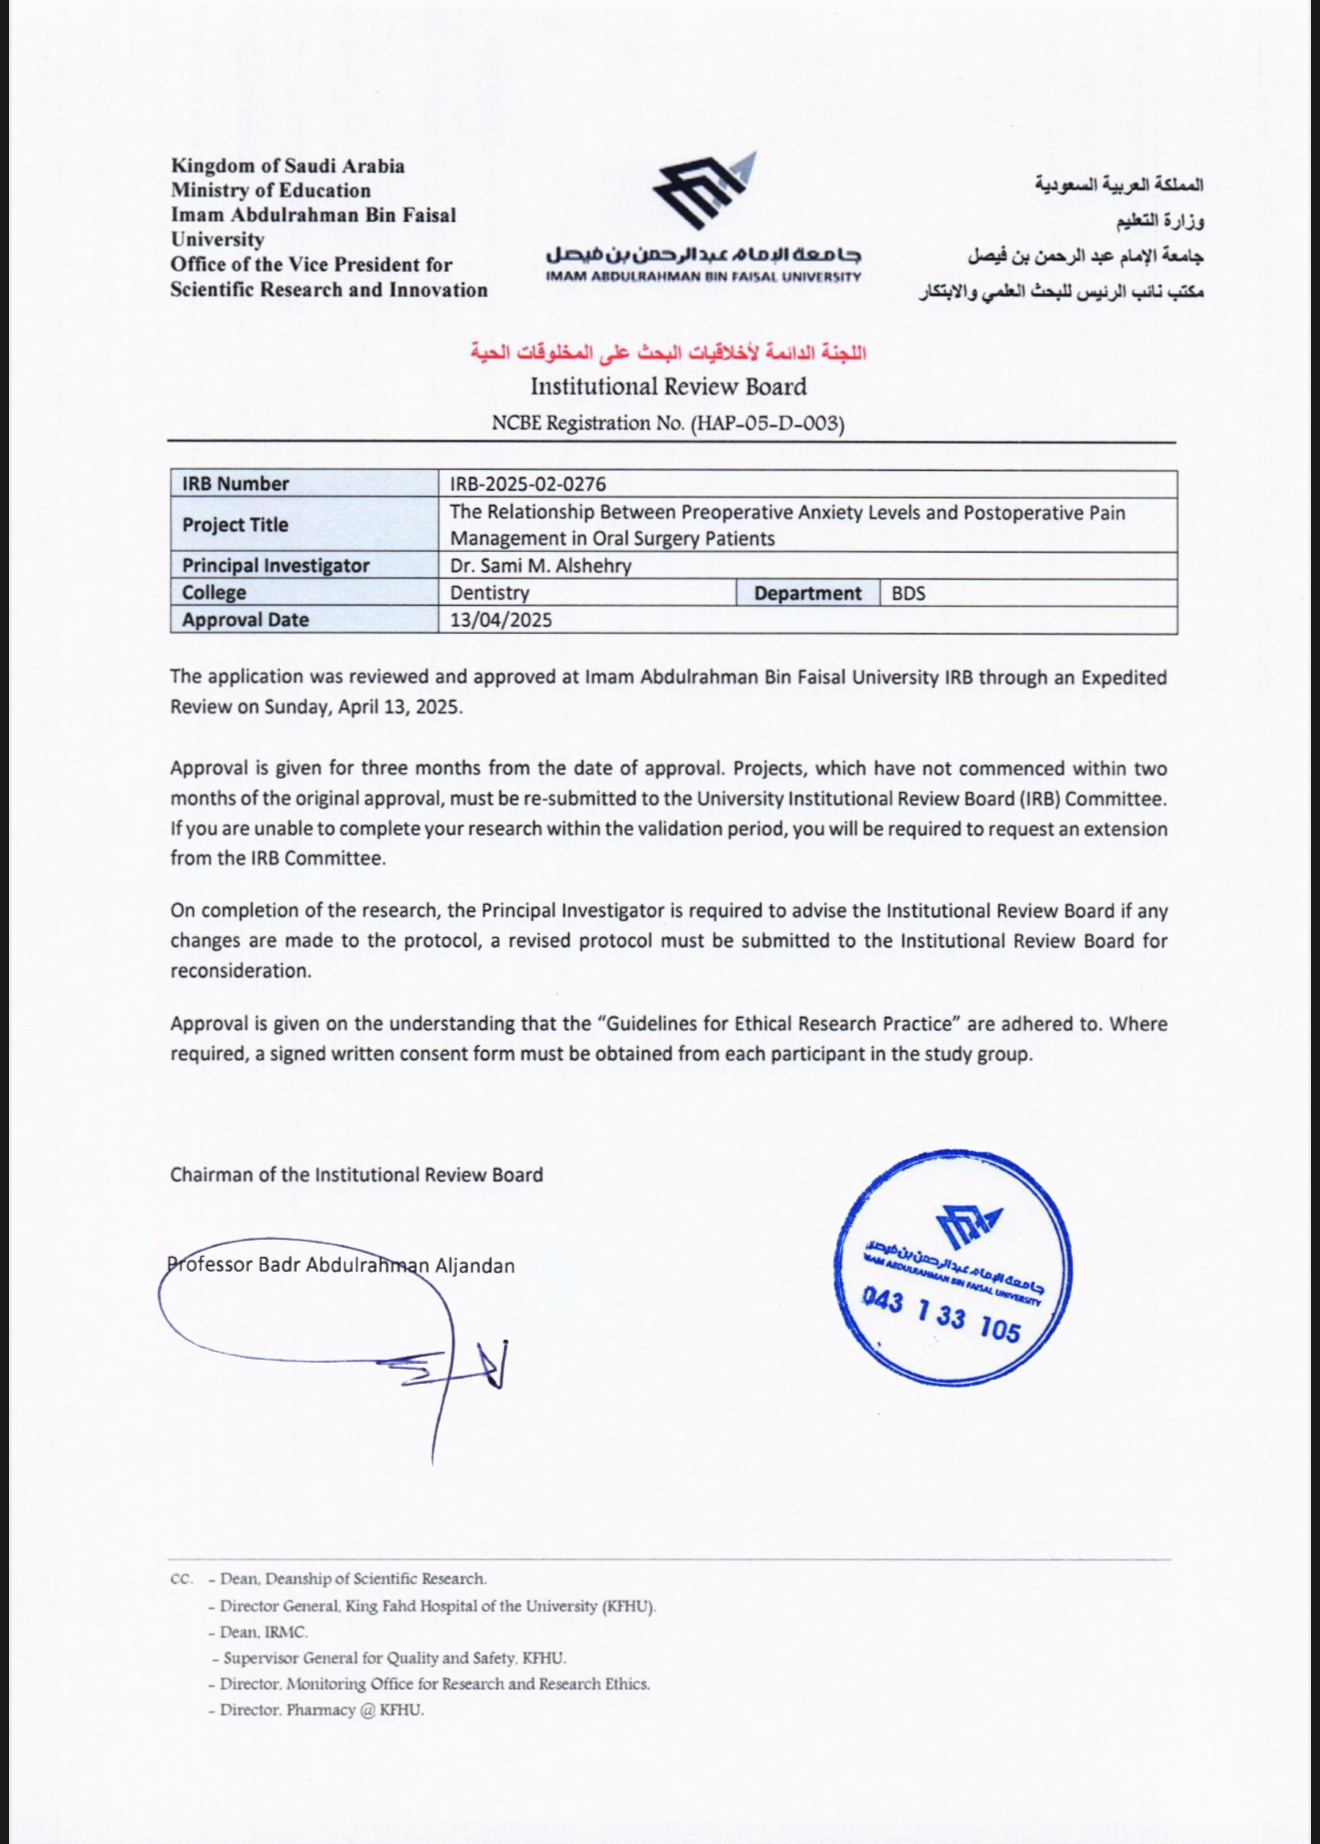

Supplement: Supplementary file 1 [file 899eedb9d7e703dbc91aa096.docx]
